## LABORATORY INVESTIGATIONS

Anesthesiology  
77:74-78, 1992

### *Influence of Lidocaine on Leukocyte Function in the Surgical Wound*

Anders S. Eriksson, M.D.,\* Robert Sinclair, M.D.,† Jean Cassuto, M.D., Ph.D.,‡ Peter Thomsen, M.D., Ph.D.§

The inflammatory response of the wound is mediated to a large extent by leukocytes, which play an important role in the wound healing process. Local anesthetics, which are routinely administered before minor skin surgery and for postoperative pain relief, have been shown to have diverse effects on wound healing. Local anesthetics have also been reported to induce potent inhibition of leukocytes *in vitro*, although their effects on leukocyte activity in the surgical wound have not been elucidated. The present study investigated the *in vivo* effects of lidocaine on leukocyte function in the surgical wound of rats by sampling leukocytes from hollow titanium implants. The surgical wound was treated with lidocaine or placebo after implantation of the titanium chamber and before skin closure. Leukocyte metabolic activity was measured by chemiluminescence. Cell count was analyzed in a Bürker chamber. Results showed progressive increase in leukocyte counts in the wounds of control animals and significantly lower cell counts in the wounds of lidocaine-treated animals 48 h ( $P < 0.05$ ) and 72 h ( $P < 0.05$ ) after surgery. A pronounced inhibition of the metabolic response to serum-opsonized zymosan was seen after 8 h in the lidocaine-treated animals *versus* controls ( $P < 0.05$ ). After 24 h, leukocyte metabolic activity decreased dramatically in the control group and remained at a low level until 72 h after surgery. In the lidocaine-treated group, the leukocyte response to zymosan remained constantly low throughout the study. The effects of lidocaine were not a result of impaired leukocyte viability. Our results showed that administration of lidocaine in the surgical wound reduced leukocyte migration and metabolic activation in the wound area. These *in vivo* results suggest, in accordance with previous *in vitro* studies, a reduced release of tissue-toxic substances such as oxygen free radicals and lysozymes known to impair wound healing. Previous reports on improved wound healing with lidocaine may be explained by the present results. (Key words: Anesthetics, local: lidocaine. Anesthetic techniques: topical. Biocompatible materials. Blood: leukocytes. Inflammation. Measurement techniques: luminescence. Titanium. Wound healing.)

DAMAGE TO THE SKIN will invariably induce an inflammatory reaction. A major component of this reaction is the migration of leukocytes into the wound, where these cells play an important role in the defense against foreign agents, removal of tissue debris, and wound healing.<sup>1</sup> In a sterile wound, however, excessive production of tissue-toxic substances by the leukocytes will primarily cause tissue damage leading to impaired wound healing.<sup>2,3</sup>

Local anesthetics are routinely used to prevent pain in connection with minor surgery and for postoperative pain relief. The effects of local anesthetics on wound healing have therefore attracted the interest of several investigators, but with conflicting results. Some investigators have reported delayed wound healing with local anesthetics,<sup>4</sup> whereas others have reported no negative effects<sup>5</sup> or even improved wound healing.<sup>6,†</sup> These conflicting reports on wound healing and the importance of leukocytes in this process led us to investigate the actions of local anesthetics on leukocyte activity in the area of surgery.

Previous studies have shown that amide local anesthetics interfere with various steps of the inflammatory response of leukocytes.<sup>7-15</sup> However, little information is available regarding the *in vivo* effects of local anesthetics on leukocyte activity in the area of surgery. In the present *in vivo* study, leukocytes were sampled from the wound by means of a titanium implant,<sup>16</sup> and the effects of lidocaine administered in the surgical wound on leukocyte accumulation and metabolic activation were investigated.

#### Materials and Methods

Experiments were performed on male Sprague-Dawley rats weighing 250-300 g. The experimental protocol was approved by the Animal Use Committee. Animals were housed for at least 7 days prior to experiments in a ventilated and temperature-controlled room and had food

\* Research Fellow in Anatomy.

† Fellow in Anesthesiology.

‡ Associate Professor of Physiology.

§ Associate Professor of Anatomy.

Received from the Department of Anesthesiology, Central Hospital, Mölndal and the Department of Anatomy, Gothenburg University, Sweden. Accepted for publication February 15, 1992. Supported by grants from Bohuslandstinget, the Medical Society of Gothenburg, the Swedish Society for Medical Sciences, the King Gustaf V 80-Year Fund, the Medical Faculty, Gothenburg University, the Swedish National Association against Rheumatism, the Swedish National Board for Technical Development (grants 90-00536 and 90-01480) and the Swedish Medical Research Council (grants 09072 and 09495). Presented in part at the Meeting of the Scandinavian Society of Anesthesiologists, Linköping, Sweden, June 29-July 3, 1987.

Address reprint requests to Dr. Cassuto: Department of Anesthesiology, Central Hospital, S-431 80 Mölndal, Sweden.

† Missavage AE, Gunther RA: Healing of porcine wounds with topical lidocaine cream (abstract). Proceedings of the American Burn Association 22:172, 1990.

and water available *ad libitum*. The day-night cycle was constant, with 12 h light and 12 h dark. Anesthesia was induced with a mixture of diazepam (5 mg/ml), pentobarbital (Nembutal) (50 mg/ml), and isotonic saline in a 2:1:1 volume ratio (0.15 ml/100 g body weight) administered intraperitoneally.

In all experiments, a midline incision (1–1.5 cm) was made through the abdominal skin, which had been closely shaved and sterilized by an iodine solution (0.1% Jodopax® in ethanol). After blunt dissection of the right rectus muscle, a titanium chamber was placed in direct contact with the peritoneum<sup>16</sup> (fig. 1). The rectus sheath and fascia were closed over the chamber by resorbable sutures (Vicryl® 5-0, Ethicon). The skin was sutured with two single silk sutures (3-0, Ethicon).

The fenestrated hollow chambers were made of commercially pure titanium and ultrasonically cleaned for 15 min in ethanol (70%), trichloroethylene, and ethanol (70%), in that order, and then kept in absolute ethanol until implantation, before which they were rinsed in sterile isotonic saline. In one group of rats (n = 24), the surgical wound was pretreated with 10 mg lidocaine (0.1 ml, lidocaine aerosol, 100 mg/ml) prior to implantation of the chamber. In the second group of rats (n = 24), the wound was treated with a corresponding volume of a placebo aerosol with identical contents except for lidocaine. We chose topical administration of the aerosol solutions rather than infiltration of the local anesthetic because of the adhesive properties of the aerosol to biologic tissues, since

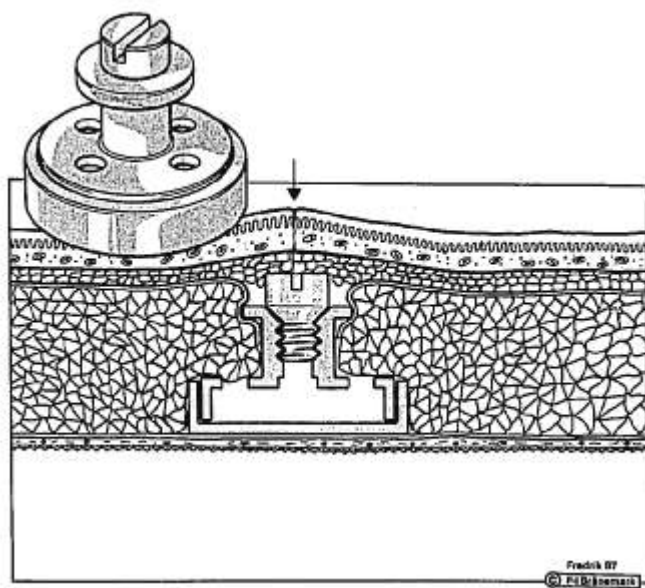

FIG. 1. Cross section of the titanium chamber illustrating the procedure by which exudate is sampled. After re-incision of the skin, the cover screw is removed; a syringe is inserted into the body of the chamber; and its content is aspirated for further analysis. (Reproduced from Eriksson *et al.*,<sup>16</sup> with permission from Butterworth-Heinemann Ltd.)

the loose skin of the rat does not allow an infiltration to remain in the area of administration. Before skin closure, 30  $\mu$ l phenol-red-free Hank's balanced salt solution (HBSS) was injected into the titanium chamber in all of the animals (experimental and control).

After 8 h (n = 6 lidocaine, n = 6 control), 24 h (n = 6 lidocaine, n = 6 control), 48 h (n = 6 lidocaine, n = 6 control), and 72 h (n = 6 lidocaine, n = 6 control), the rats were killed by administration of 2.5 mg diazepam and 25 mg pentobarbital intraperitoneally followed by cutting of the heart. Subsequently, the surgical wound was reopened, and the chamber contents were collected by repeated washing with HBSS followed by aspiration, yielding a total sample of 150  $\mu$ l. A volume of 5  $\mu$ l of the collected exudate was used for counting the total number of leukocytes in a Bürker chamber. Leukocyte viability was measured by trypan blue dye exclusion in order to exclude the possibility that the results of the study were a consequence of cell death. Differential cell counts were performed on slides after Ehrlich's hematoxylin-eosin staining.

The remaining exudate was immediately diluted with HBSS and adjusted to  $0.5 \times 10^6$  leukocytes/ml and kept on ice until analysis of leukocyte metabolic activation by chemiluminescence.<sup>17</sup> Zymosan particles (Sigma), used to stimulate phagocytic activity, were washed in HBSS and incubated with rat serum for 30 min at 37° C. The particles were subsequently washed and suspended in HBSS to a concentration of 12.5 mg/ml. Luminol (5-amino-2,3-dihydro-1,4-phthalazinedione) (Sigma) was dissolved in dimethyl sulfoxide (Merck, Germany) to give 5.5 mg/ml, stored at –20° C, and diluted 1:20 in HBSS before use. Before analysis by chemiluminescence, the cell suspension (100  $\mu$ l) was preincubated in a plastic vial for 10 min at 37° C. The chemiluminescence reaction was started by addition of luminol (100  $\mu$ l) and rat serum-opsonized zymosan particles (100  $\mu$ l). Chemiluminescence recordings were performed at 37° C in a luminometer (LKB 1251, Wallac, Finland) and recorded by computer at 40-s intervals for 30 min. The peak chemiluminescence (millivolts) was determined and used for statistical analysis. All of the analyses were performed by an assistant blinded to the study protocol.

All data were subject to analysis of variance followed by Duncan's multiple-range test for determination of significant differences at the 5% level. Contrasts were formed at a 99% confidence interval. Data are mean  $\pm$  SEM.

## Results

In control animals, the number of leukocytes in the surgical wound was progressively increased and reached a level significantly greater than that in lidocaine-treated animals at 48 h ( $P < 0.05$ ) and 72 h ( $P < 0.05$ ) after surgery (fig. 2).

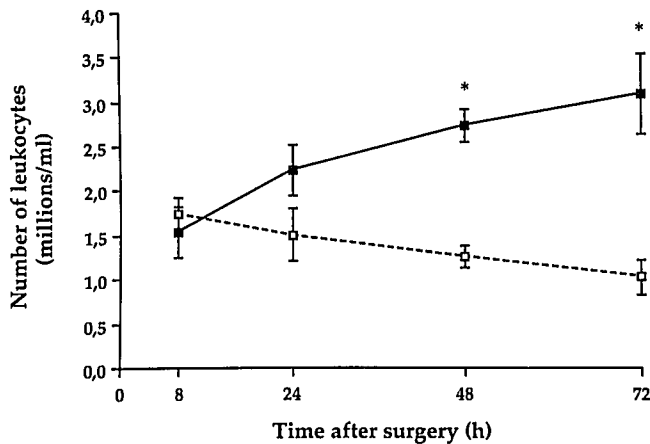

FIG. 2. Granulocyte count in exudate sampled from a titanium implant in the surgical wound of animals topically treated with lidocaine (dashed line) and in control animals (solid line). Leukocyte count was performed in a Bürker chamber. \* $P < 0.05$  versus control group. Other differences between the groups were not significant. Data are mean  $\pm$  SEM.

Leukocyte metabolic responsiveness measured by chemiluminescence was significantly greater in the control group 8 h after surgery as compared to lidocaine-treated animals ( $P < 0.05$ ) (fig. 3). Chemiluminescence was markedly reduced 24 h after surgery in the control group and remained low. In the lidocaine group, leukocyte metabolic responsiveness was constantly low throughout the study (fig. 3).

Leukocyte viability (percent) after surgery did not differ significantly between the groups at 8 h (lidocaine  $99.3 \pm 0.38$ , control  $99.8 \pm 0.15$ ), or 24 h (lidocaine  $89.5 \pm 1.71$ , control  $90.8 \pm 0.83$ ). Differences between the groups were significant at 48 h (lidocaine  $87.0 \pm 1.20$ , control  $78.5 \pm 2.34$ ) ( $P < 0.05$ ) and 72 h (lidocaine  $91.3 \pm 1.99$ , control  $81.5 \pm 3.19$ ) ( $P < 0.05$ ) after surgery.

### Discussion

In the present study we used a titanium chamber to harvest wound exudate for further *in vitro* analysis. This could be questioned on the grounds that the chamber itself may add to the inflammatory reaction induced by the surgical trauma. However, pure titanium has been shown to have good biocompatible properties, as was demonstrated in soft tissues where titanium induced an inflammatory reaction significantly less than that observed with commonly used polymer surgical implants.<sup>16-18</sup> This biocompatibility of titanium has also been observed in patients in whom screw-shaped titanium implants have been used to anchor artificial teeth.<sup>19</sup> In clinical practice, where interactions between cells and implants may play a crucial role for the acceptance of biomaterials,<sup>20</sup> the use

of agents with antiinflammatory properties could have potential influence on the healing of surgical implants. Although the present study shows that the inflammatory response is favorably modulated by lidocaine, its possible effects on the unwanted fibrous capsule formation invariably seen around soft tissue implants remains to be shown.

The attraction of leukocytes to an inflammatory site involves several vascular and extravascular events in which leukocytes interact with chemotactic factors, other cells, and the three-dimensional matrix until eventually reaching the inflammatory focus.<sup>21</sup> The present observation of a reduced number of leukocytes in lidocaine-treated animals (fig. 2) could therefore be attributed to an interference with several of these events. Lidocaine has been shown to inhibit leukocyte adherence *in vitro*<sup>7,8</sup> and cause a dose-dependent reduction of leukocyte adherence to the vessel wall<sup>9</sup> and inflammatory peritoneum *in vivo*.<sup>10</sup> Since leukocyte emigration from blood vessels involves adhesion to endothelial cells,<sup>1,9</sup> a decreased leukocyte adhesiveness may explain part of the drastic reduction of accumulated cells in the chamber.

Another possible explanation for the reduced number of leukocytes in the wound is the inhibition by lidocaine of the migratory properties of leukocytes in the three-dimensional extracellular matrix between the blood vessels and the chamber. *In vitro* studies have shown that motility and migration on a two-dimensional substratum is reduced by lidocaine,<sup>8,10,12</sup> but we lack knowledge with regard to the effects of lidocaine on leukocyte migration in a three-dimensional collagenous matrix, which does

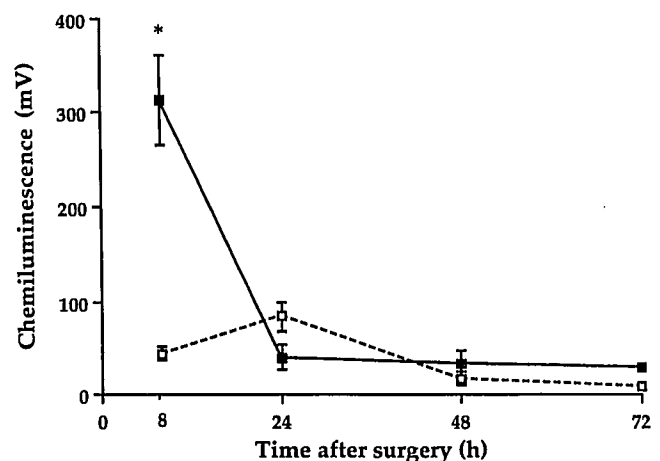

FIG. 3. Chemiluminescence (peak levels) of leukocytes from a surgical wound by the use of a titanium chamber after stimulation *in vitro* with serum opsonized zymosan. The wound was treated in connection with the surgical procedure with lidocaine (dashed line) or placebo (solid line). Base line indicates chemiluminescence in leukocytes prior to stimulation *in vitro*. \* $P < 0.05$  versus control group. Other differences between the groups were not significant. Data are mean  $\pm$  SEM.

not appear to be adhesion-dependent.<sup>22-24</sup> An additional explanation for the reduced number of accumulated cells in lidocaine-treated animals could be that, by reducing the metabolism of cells that already have reached the inflammatory site, the release of chemoattractants from these activated cells is inhibited, and, as a consequence, the continued accumulation of leukocytes also is inhibited. This is supported by recent *in vitro* data showing that the leukocyte-derived release of the potent chemoattractant substances leukotriene B<sub>4</sub><sup>25-28</sup> and interleukin-1<sup>28,29</sup> is strongly inhibited by local anesthetics.<sup>30</sup>

Considering that infiltration of lidocaine normally blocks nerve conduction for about 1-3 h,<sup>31</sup> the inhibition of leukocyte migration by lidocaine was surprisingly long-lasting. Several possible explanations can be offered. Reduced venous outflow, capillary and venous stasis, and slowed capillary blood flow in the incisional area due to shunting or thrombosis of injured vessels<sup>32</sup> could have reduced washout of the drug from the wound area and prolonged its effect. Alternatively, the local anesthetic formulation used in the present study could have acted as a slow-release unit because of its adhesive properties, as described for similar anesthetic formulations.<sup>33</sup> This possibility is supported by clinical data showing measurable plasma levels of lidocaine 48 h after a single aerosol administration in the surgical wounds of patients undergoing hysterectomy<sup>34</sup> and 72 h after surgery in postcholecystectomy patients (unpublished results).

In accordance with earlier *in vitro* studies showing inhibition of leukocyte metabolism by local anesthetics,<sup>11-13</sup> we found in the present *in vivo* study a strongly inhibited chemiluminescence in lidocaine-treated animals in response to zymosan particles (fig. 3). This metabolic inhibition by lidocaine was not the result of cell damage, since cell viability was similar in both groups.

It is generally accepted that one of the main purposes of wound inflammation is to protect the body against foreign agents such as microorganisms. The inhibition by lidocaine of leukocyte metabolic activation to zymosan (fig. 3) may suggest an impaired host response to microorganisms.<sup>35</sup> However, several studies have shown local anesthetics to possess potent antimicrobial properties *in vitro*<sup>36,37</sup> and *in vivo*.<sup>38</sup> It is also a general impression that the oxidative damage that occurs immediately follows tissue injury, and that the need for that oxidative activity for killing infection probably occurs much later.<sup>39</sup> Moreover, in a clean surgical wound there is little need for antimicrobial activity by leukocytes in the early postoperative period.

The present results showing reduced inflammatory response in the surgical wound by the local anesthetic may imply impaired wound healing by the agent. The high metabolic activity of granulocytes seen in the control group of this study (fig. 3) is equivalent to increased release

of superoxide anions and lysosomal enzymes,<sup>14,15</sup> which play a central role in progressive tissue damage.<sup>40</sup> In addition, increased release of other inflammatory mediators, such as thromboxanes, leukotrienes, and interleukins, have been shown to promote microvascular permeability and tissue edema<sup>41</sup> and to induce platelet aggregation and vascular damage,<sup>42</sup> which will interfere with normal wound healing. Lidocaine has been shown to inhibit the release of both leukotrienes and interleukins<sup>30</sup> and to dissolve thrombus formation,<sup>43</sup> which, along with the present results, may in part explain the improved healing induced in partial-thickness wounds by lidocaine; this suggests that local anesthetics reduce harmful wound activity normally resulting in impaired healing and excessive scarring.

In conclusion, the current results show that administration of a local anesthetic in the area of surgery reduces granulocyte accumulation and metabolic activation, suggesting reduced release of tissue-toxic substances in the traumatized tissue by lidocaine, which may explain the positive effects reported for the agent on wound healing.

## References

1. Wintroub BU: Inflammation and mediators. *Int J Dermatol* 19: 436-442, 1980
2. Ward PA, Till GO: The autodestructive consequences of thermal injury. *J Burn Care Rehabil* 6:251-255, 1985
3. Lewis RA, Auster KF: Mediation of local homeostasis and inflammation by leukotrienes and other mast cell-dependant compounds. *Nature* 293:103-108, 1981
4. Davies B, Guyuron B, Husami T: The role of lidocaine, epinephrine, and flap elevation in wound healing after chemical peel. *Ann Plast Surg* 26(3):273-8, 1991
5. Vasseur PB, Paul HA, Dybdal N, Crumley L: Effects of local anesthetics on healing of abdominal wounds in rabbits. *Am J Vet Res* 45:2385-8, 1984
6. Kanta J, Kopacova L, Patockova M, Bartos F: Effect of carbanilate local anesthetics on granulation tissue formation. *Pol J Pharmacol Pharm* 36:659-663, 1984
7. Schiffer CA, Sanel FT, Young VB, Aisner J: Reversal of granulocyte adherence to nylon fibers using local anesthetic agents: Possible application to filtration leukapheresis. *Blood* 50:213-225, 1977
8. Schreiner A, Hopen G: Adhesion and locomotion of human leukocytes in vitro: Importance of protein coating, effect of lidocaine, ethanol and endotoxin. *APMIS (Sect C)* 87:333-340, 1979
9. Giddon DB, Lindhe J: In vivo quantitation of local anesthetic suppression of leukocyte adherence. *Am J Pathol* 68:327-338, 1972
10. MacGregor RR, Thorner RE, Wright DM: Lidocaine inhibits granulocyte adherence and prevents granulocyte delivery to inflammatory sites. *Blood* 56:203-209, 1980
11. Cullen BF, Haschke RH: Local anesthetic inhibition of phagocytosis and metabolism of human leukocytes. *ANESTHESIOLOGY* 40: 142-146, 1974
12. Hammer R, Dahlgren C, Stendahl O: Inhibition of human leukocyte metabolism and random mobility by local anaesthesia. *Acta Anaesthesiol Scand* 29:520-523, 1985
13. Sinclair R, Cassuto J, Thomsen P: Local anesthetics inhibit leukocyte activation induced by immune complexes and opsonized

- zymosan particles. *Acta Anaesthesiol Scand* 31(suppl 86):144, 1987
14. Goldstein IM, Lind S, Hoffstein S, Weissman G: Influence of local anesthetics upon human polymorphonuclear leukocyte function in vitro. Reduction of lysosomal enzyme release and superoxide anion production. *J Exp Med* 146:483-494, 1977
  15. Nakagawara M, Hirokata Y, Yoshitake: Effects of anesthetics on super-oxide releasing activity on human polymorphonuclear leukocytes. *Masui* 34:754-759, 1985
  16. Eriksson AS, Bjursten LM, Ericson LE, Thomsen P: Hollow implants in soft tissues allowing quantitative studies of cells and fluid at the implant interface. *Biomaterials* 9:86-90, 1988
  17. Thomsen P, Bjursten LM, Ericson LE: Joint fluid leukocyte activation by preformed immune complexes. *Inflammation* 10: 243-256, 1986
  18. Thomsen P, Bjursten LM, Ericson LE: Implants in the abdominal wall of the rat. *Scand J Plast Reconstr Surg* 20:173-182, 1986
  19. Bränemark PI, Hansson BO, Adell R, Breine U, Lindström J, Hallén O, Öhman A: Osseointegrated implants in the treatment of the edentulous jaw: Experience from a 10 year period. *Scand J Plast Reconstr Surg* 16:1-132, 1977
  20. Thomsen P: Titanium and the inflammatory response, The Bränemark osseointegrated implant. Edited by Albrektsson T, Zarb GA. Chicago, Quintessence Publishers Company, 1989, pp 25-35
  21. Thomsen P, Ericson LE: Leukocyte migration in synovial tissue. *Am J Pathol* 134:1213-1226, 1989
  22. Brown AF: Neutrophil granulocytes: Adhesion and locomotion on collagen substrata in collagen matrices. *J Cell Sci* 58:455-467, 1982
  23. Brown AF: Neutrophil and monocyte behaviour in three-dimensional matrices. *Scanning Electron Microsc Pt. 2*:747-752, 1984
  24. Schmalstieg FC, Rudloff HE, Hillman GR, Anderson DC: Two-dimensional and three-dimensional movement of human polymorphonuclear leukocytes: Two fundamentally different mechanisms of location. *J Leukoc Biol* 40:677-691, 1986
  25. Palmer RMJ, Stepney RJ, Higgs GA, Eakins KE: Chemokinetic activity of arachidonic acid lipoxygenase products on leukocytes of different species. *Prostaglandins* 20:411-418, 1980
  26. Palmblad J, Malmsten CL, Udén A, Rådmark O, Engstedt L, Samuelsson B: Leukotriene B<sub>4</sub> is a potent and stereospecific stimulator of neutrophil chemotaxis and adherence. *Blood* 58:658-661, 1981
  27. Sasaki K, Ueno A, Katori M, Kikawada R: Detection of leukotriene B<sub>4</sub> in cardiac tissue and its role in infarct extension through leukocyte migration. *Cardiovasc Res* 22:142-148, 1988
  28. Eriksson AS, Thomsen P: Leukotriene B<sub>4</sub>, interleukin 1 and leukocyte accumulation in titanium and PTFE chambers after implantation in the rat abdominal wall. *Biomaterials* 12:827-830, 1991
  29. Terui T, Kato T, Suzuki R, Kumagi K, Tagami H: Effects of interleukin-1 on chemotaxis and chemiluminescence of human neutrophils. *Tohoku J Exp Med* 149:317-322, 1986
  30. Sinclair R, Eriksson AS, Cassuto J, Thomsen P: Inhibitory effects of amide local anesthetics on stimulus-induced human leukocyte metabolic activation, LTB<sub>4</sub> release and IL-1 secretion in vitro. *Acta Anaesthesiol Scand*, in press
  31. Covino BG, Vasallo HG: General pharmacological and toxicological aspects of local anesthetic agents, *Local Anesthetics: Mechanisms of Action and Clinical Use*. New York, Grune & Stratton, 1976 pp 131-140
  32. Zweifach BW: Microvascular aspects of tissue injury, *Advances in Pain Research and Therapy*. Volume 1. Edited by Bonica JJ, Albe-Fessard D. New York, Raven Press, 1976, pp 17-28
  33. Haynes DH, Kirkpatrick AF: Ultra-long-duration local anesthesia produced by injection of lecithin-coated methoxyflurane microdroplets. *ANESTHESIOLOGY* 63:490-499, 1985
  34. Sinclair R, Westlander G, Cassuto J: Lidocaine aerosol for post-operative pain control in hysterectomized patients. *Acta Anaesthesiol Scand* 31(suppl 86):98, 1989
  35. Dickstein R, Kiremidjian-Schumacher L, Stotzky G: Effect of lidocaine on the function of immunocompetent cells: I. In vitro exposure of mouse spleen lymphocytes and peritoneal macrophages. *Immunopharmacology* 9:117-125, 1985
  36. Ravin CE, Latimer JM, Matsen JM: In vitro effects of lidocaine on anaerobic respiratory pathogens and strains of hemophilus influenzae. *Chest* 72:439-441, 1977
  37. Rosenberg PH, Renkonen OV: Antimicrobial activity of bupivacaine and morphine. *ANESTHESIOLOGY* 62:178-179, 1985
  38. Conte BA, Laforet EG: The role of the topical anesthetic agent in modifying bacteriologic data obtained by bronchoscopy. *N Engl J Med* 267:957-960, 1962
  39. Ward PA: How does the local inflammatory response affect the wound healing process? *J Trauma* 24 S:18-24, 1984
  40. Asko-Seljavaara S: Granulocyte kinetics in burns. *J Burn Care Rehabil* 8:492-495, 1987
  41. Casley-Smith JR, Casley-Smith JR: The effects of diosmin (a benzopyrone) upon some high-protein oedemas: Lung contusion, and burn and lymphoedema of rat legs. *Agents Actions* 17:14-20, 1985
  42. Ehrlich HP, Needle AL, Rajaratnam J, White ME, White BS: The role of prostacyclin and thromboxane in rat burn and freeze injuries. *Exp Mol Pathol* 38:357-367, 1979
  43. Luostarinen V, Evers H, Lyytikäinen MT, Scheinin A, Wahlén A: Antithrombotic effects of lidocaine and related compounds on laser-induced microvascular injury. *Acta Anaesthesiol Scand* 25:9-11, 1981
